# Supplementary material
Source: MDPI journal article supplement (https://www.mdpi.com/1996-1073/13/5/1241)

# Hydrothermal Depolymerization of Biorefinery Lignin-rich Streams: Influence of Reaction Conditions and Catalytic Additives on the Organic Monomers Yields in Biocrude and Aqueous Phase

Stefano Dell’Orco <sup>1,2</sup>, Edoardo Miliotti <sup>1</sup>, Giulia Lotti <sup>1</sup>, Andrea Maria Rizzo <sup>1</sup>, Luca Rosi <sup>1,3</sup> and David Chiaramonti <sup>1,2\*</sup>

<sup>1</sup> RE-CORD, Viale Kennedy 182, 50038, Scarperia e San Piero, Florence, Italy; edoardo.miliotti@re-cord.org (E.M.); giulia.lotti@re-cord.org (G.L.); andreamaria.rizzo@re-cord.org (A.M.R.); luca.rosi@re-cord.org (L.R.)

<sup>2</sup> Department of Industrial Engineering, University of Florence, Viale Morgagni 40, 50135, Florence, Italy; david.chiaramonti@unifi.it (D.C.); stefano.dellorco@unifi.it (S.D.O.)

<sup>3</sup> Chemistry Department “Ugo Schiff”, University of Florence, Via della Lastruccia, 3-13 50019 Sesto Fiorentino, Florence, Italy

\* Correspondence: david.chiaramonti@re-cord.org; Tel.: +39- 055-2758690

## 1. Analytical Methods

All solvents and reagents required for this work were purchased from Carlo Erba and Sigma Aldrich: they were used as received without any further purification. All chemicals were ACS reagent grade. Water for HPLC was HPLC grade. Ultrapure water (0.055  $\mu\text{S cm}^{-1}$ ) for HTL experiments was collected from TKA Microlab ultrapure water system. Analytical standards for GC and HPLC were  $\geq 98\%$  purity. Chemical standards for instrument calibrations were purchased from Leco for CHNS analysis. All gases were purchased from Rivoira. Argon, air, nitrogen and  $\text{CO}_2$  were provided with a 99.999 % purity, helium with a 99.9995 % purity.

**Error! Reference source not found.** shows the calibration compounds selected for the qualitative and quantitative analysis of BC1 and AP in GC-MS and HPLC.

**Table S1.** Compounds calibrated in GC-MS and HPLC.

| Compound class | GC-MS                                         | HPLC           |
|----------------|-----------------------------------------------|----------------|
| Sugars         |                                               | D-cellobiose   |
|                |                                               | D(+)glucose    |
|                |                                               | D(+)xylose     |
|                |                                               | D(+)galactose  |
|                |                                               | L(+)arabinose  |
|                |                                               | D(+)mannose    |
|                |                                               | Xylitol        |
| Acids          | Acetic acid<br>Propionic acid<br>Benzoic acid | Acetic acid    |
|                |                                               | Propionic acid |
|                |                                               | Benzoic acid   |
|                |                                               | Succinic acid  |
|                |                                               | Lactic acid    |
|                |                                               | Glutaric acid  |
|                |                                               | Glycolic acid  |
| Alcohols       |                                               | Methanol       |
|                |                                               | Ethanol        |

|                    |                                                                                                                                                                                             |                                     |
|--------------------|---------------------------------------------------------------------------------------------------------------------------------------------------------------------------------------------|-------------------------------------|
|                    |                                                                                                                                                                                             | Glycerol                            |
| Alkylphenols       | m-Cresol<br>p-Cresol<br>o-Cresol                                                                                                                                                            |                                     |
| Aromatics/HC       | Toluene                                                                                                                                                                                     |                                     |
| Catechols          | 1,2-Benzenediol<br>1,4-Benzenediol                                                                                                                                                          | 1,2-Benzenediol                     |
| Dimethoxyphenols   | Phenol, 2,6-dimethoxy-                                                                                                                                                                      | Phenol, 2,6-dimethoxy-              |
| Furanics           | HMF<br>2-Acetylfuran                                                                                                                                                                        | HMF                                 |
| Ketones            | Cyclopentanone<br>2-Cyclopenten-1-one<br>2-Cyclopenten-1-one, 2,3-dimethyl-<br>2-Cyclopenten-1-one, 3-methyl-<br>1,2-Cyclopentanedione, 3-methyl-                                           | 1,2-Cyclopentanedione,<br>3-methyl- |
| Methoxycatechols   | 1,4-Benzenediol, 3-methoxy-                                                                                                                                                                 | 1,4-Benzenediol, 3-methoxy-         |
| Methoxyphenols     | Phenol, 2-methoxy-<br>Phenol, 2-methoxy-4-propyl-<br>Phenol, 2-methoxy-4-methyl-<br>Phenol, 2-methoxy-4-propenyl-<br>Phenol,<br>2,6-dimethoxy-4-(2-propenyl)-<br>Phenol, 4-ethyl-2-methoxy- | Phenol, 2-methoxy-                  |
| Phenolic Aldehydes | Benzaldehyde,<br>4-hydroxy-3-methoxy-<br>Benzaldehyde,<br>4-hydroxy-3,5-dimethoxy-                                                                                                          |                                     |
| Phenolic Ketones   | Ethanone,<br>1-(3-hydroxy-4-methoxyphenyl)-<br>Ethanone,<br>1-(4-hydroxy-3,5-dimethoxyphenyl)-                                                                                              |                                     |
| Phenol             | Phenol                                                                                                                                                                                      | Phenol                              |

## 2. Slurry feedstock analysis

The aqueous fraction of LRS slurry sample, prepared at 10 wt.% B/W, was filter and analyzed in HPLC. Figure S1 depicts the water-solubles compounds in the LRS slurry before the depolymerization reactions, highlighting the presence of sugars and carboxylic acids trapped in the stream after the ethanol fermentation step in the industrial plant.

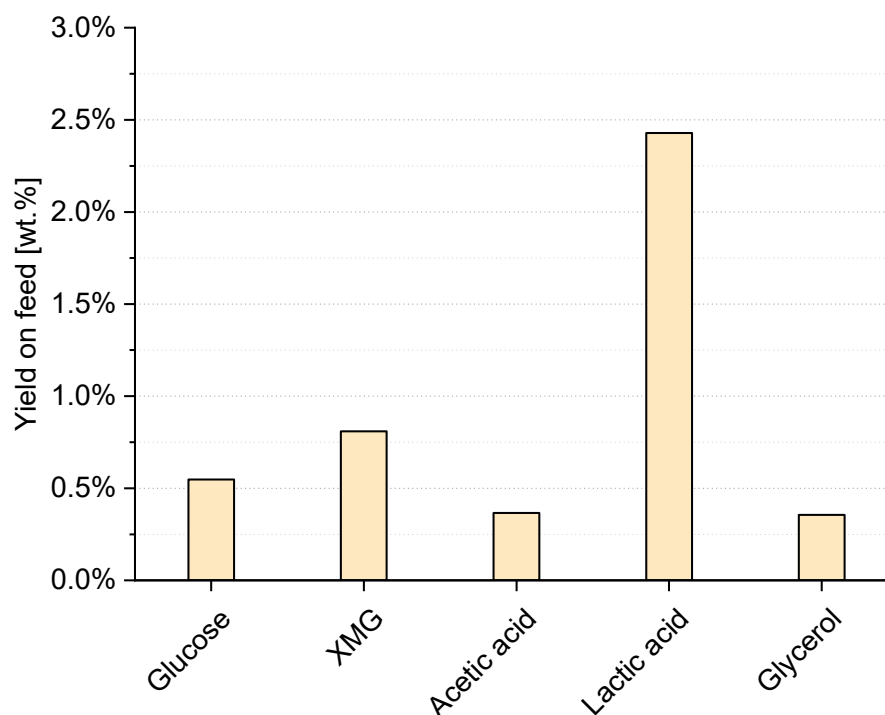

**Figure S1:** Water-soluble compounds in LRS liquid fraction of the slurry: yield on feed at 10 wt.% and 20 wt.% of B/W.

## 3. HTL overall products mass yields

The whole yield dataset obtained after LRS HTL is reported in **Error! Reference source not found.**, including the standard deviation measured for each collected product during the test replications.

**Table S2.** Yields of the HTL products from all investigated reaction conditions. Absolute standard deviation is reported in brackets.

| Exp. Conditions                | Catalyst | BC1             | BC2              | SR              | Gas            | WSO + loss*      |
|--------------------------------|----------|-----------------|------------------|-----------------|----------------|------------------|
| 300°C<br>5 min<br>10 wt.% B/W  | -        | 9.8%<br>(1.6%)  | 38.8%<br>(11.5%) | 16.5%<br>(3.0%) | 2.4%<br>(0.7%) | 32.6%<br>(10.5%) |
| 300°C<br>10 min<br>10 wt.% B/W | -        | 11.0%<br>(0.3%) | 33.0%<br>(7.7%)  | 19.5%<br>(2.0%) | 1.5%<br>(1.9%) | 34.9%<br>(9.8%)  |
| 350°C<br>5 min<br>10 wt.% B/W  | -        | 27.0%<br>(6.7%) | 32.0%<br>(6.4%)  | 11.4%<br>(0.9%) | 4.5%<br>(0.8%) | 23.8%<br>(5.4%)  |

|                                |                  |                 |                 |                 |                |                  |
|--------------------------------|------------------|-----------------|-----------------|-----------------|----------------|------------------|
| 350°C<br>10 min<br>10 wt.% B/W | -                | 29.3%<br>(0.0%) | 22.5%<br>(6.4%) | 11.8%<br>(0.2%) | 5.5%<br>(1.4%) | 30.9%<br>(7.0%)  |
| 370°C<br>5 min<br>10 wt.% B/W  | -                | 36.8%<br>(1.7%) | 15.8%<br>(3.1%) | 13.0%<br>(0.9%) | 4.0%<br>(0.1%) | 30.3%<br>(2.3%)  |
| 300°C<br>5min<br>10 wt.% B/W   | 2 wt.%<br>KOH    | 18.8%<br>(0.7%) | 36.5%<br>(2.6%) | 13.5%<br>(0.7%) | 2.2%<br>(n.d.) | 29.0%<br>(2.6%)  |
| 350°C<br>5 min<br>10 wt.% B/W  | 2 wt.%<br>KOH    | 37.0%<br>(1.4%) | 17.0%<br>(0.5%) | 10.2%<br>(0.7%) | 4.4%<br>(0.6%) | 31.3%<br>(1.1%)  |
| 370°C<br>5 min<br>10 wt.% B/W  | 2 wt.%<br>KOH    | 39.2%<br>(0.5%) | 9.7% (1.9%)     | 12.3%<br>(0.0%) | 4.3%<br>(0.1%) | 34.5%<br>(2.0%)  |
| 350°C<br>5 min<br>10 wt.% B/W  | 4 wt.%<br>KOH    | 35.5%<br>(2.1%) | 17.7%<br>(1.4%) | 9.3% (0.5%)     | 2.2%<br>(0.3%) | 35.4%<br>(0.6%)  |
| 300°C<br>5 min<br>10 wt.% B/W  | sCO <sub>2</sub> | 15.5%<br>(5.0%) | 38.1%<br>(8.2%) | 16.2%<br>(0.7%) | 3.3%<br>(n.d.) | 26.9%<br>(2.56%) |

\* calculated by difference, n.d.: not determined

#### 4. Qualitative BC1 analysis

An example of a complete BC1 GC-MS qualitative analysis with absolute and relative peaks area is reported in Table S3. The identified compounds are divided in classes to facilitate the data reading.

**Table S3:** Qualitative analysis of a light biocrude sample produced at 350 °C, 10 min, 10 wt.% (procedure 1).

| Compounds                              | Ret.<br>Time | Peak<br>Area   | Peak Area<br>% |
|----------------------------------------|--------------|----------------|----------------|
| <b>Acids</b>                           |              | <b>2151718</b> | <b>2.51</b>    |
| Acetic acid                            | 1.5          | 813323         | 0.95           |
| Benzoic acid                           | 18.8         | 605610         | 0.71           |
| Benzoic acid, 4-hydroxy-,              | 22.2         | 46651          | 0.05           |
| Benzoic acid, methyl ester             | 17.2         | 32652          | 0.04           |
| Butanoic acid                          | 3.9          | 60503          | 0.07           |
| Butanoic acid, 2-methyl-               | 6.3          | 89297          | 0.1            |
| Butanoic acid, 3-methyl-               | 5.9          | 125501         | 0.15           |
| p-Coumaric acid                        | 26.0         | 49121          | 0.06           |
| Propanoic acid                         | 2.3          | 249107         | 0.29           |
| Propanoic acid, 2-methyl-              | 3.1          | 79953          | 0.09           |
| <b>Alcohols</b>                        |              | <b>161551</b>  | <b>0.19</b>    |
| 4-Hydroxy-3-methoxyphenylethyl alcohol | 25.3         | 161551         | 0.19           |
| <b>Alkylphenols</b>                    |              | <b>1194483</b> | <b>1.39</b>    |

|                                                   |      |                 |              |
|---------------------------------------------------|------|-----------------|--------------|
| Phenol, 2,4-dimethyl-                             | 18.5 | 28564           | 0.03         |
| Phenol, 2-methyl-                                 | 16.1 | 337350          | 0.39         |
| Phenol, 3-ethyl-                                  | 18.2 | 175917          | 0.21         |
| Phenol, 4-ethyl-                                  | 18.9 | 166345          | 0.19         |
| Phenol, 4-methyl-                                 | 16.7 | 486307          | 0.57         |
| <b>Aromatics/HC</b>                               |      | <b>714058</b>   | <b>0.83</b>  |
| Benzene, (1,2-dimethyl-1-propenyl)-               | 19.7 | 42199           | 0.05         |
| Benzene, 1,2,4-tripropyl-                         | 28.8 | 346325          | 0.4          |
| Naphthalene, 2,3-dimethoxy-                       | 28.9 | 176218          | 0.21         |
| Naphthalene, 2,6-dimethoxy-                       | 28.9 | 149316          | 0.17         |
| <b>Catechols</b>                                  |      | <b>5477458</b>  | <b>6.37</b>  |
| 1,2,3-Benzenetriol, 5-methyl-                     | 24.3 | 187823          | 0.22         |
| 1,2-Benzenediol, 4-ethyl                          | 22.9 | 371959          | 0.43         |
| 1,2-Benzenediol, 4-methyl-                        | 21.2 | 625851          | 0.73         |
| 1,3-Benzenediol, 4-propyl-                        | 24.4 | 371289          | 0.43         |
| 1,4-Benzenediol                                   | 21.0 | 422458          | 0.49         |
| 1,4-Benzenediol, 2,5-dimethyl-                    | 46.9 | 142710          | 0.16         |
| 1,4-Benzenediol, 2-methyl-                        | 22.3 | 574502          | 0.67         |
| 1,2-Benzenediol                                   | 19.4 | 2780866         | 3.24         |
| <b>Dimethoxyphenols</b>                           |      | <b>13437988</b> | <b>15.67</b> |
| 2,3-Dimethoxyphenol                               | 20.4 | 129738          | 0.15         |
| 3,4-Dimethoxyphenol, 2-methylpropyl ether         | 22.2 | 110302          | 0.13         |
| 4-(3-hydroxypropyl)-2,6-dimethoxyphenol           | 30.4 | 197007          | 0.23         |
| 4-(4-Hydroxy-3-methoxystyryl)-2,6-dimethoxyphenol | 49.4 | 76189           | 0.09         |
| Phenol, 2,6-dimethoxy-                            | 22.4 | 9784411         | 11.41        |
| Phenol, 2,6-dimethoxy-4-(1E)-1-propen-1-yl-       | 27.4 | 1165517         | 1.36         |
| Phenol, 2,6-dimethoxy-4-(2-propenyl)-             | 26.4 | 346115          | 0.4          |
| Phenol, 2,6-dimethoxy-4-methyl-                   | 22.8 | 47078           | 0.05         |
| Phenol, 3,4-dimethoxy-                            | 21.9 | 108115          | 0.13         |
| Phenol, 3,4-dimethoxy-, acetate                   | 22.5 | 1473516         | 1.72         |
| <b>Furanics</b>                                   |      | <b>192004</b>   | <b>0.22</b>  |
| 3,4-dimethylfuran                                 | 20.5 | 45455           | 0.05         |
| Benzofuran, 2-methyl-                             | 17.5 | 146549          | 0.17         |
| <b>Ketones</b>                                    |      | <b>1675868</b>  | <b>1.95</b>  |
| 1,3-Cyclopentanedione, 2-ethyl-2-methyl-          | 18.4 | 37007           | 0.04         |
| 2-Cyclohexen-1-one, 6-methyl-3-(1-methylethyl)-   | 21.9 | 136547          | 0.16         |
| 2-Cyclopenten-1-one, 2,3-dimethyl-                | 29.9 | 450594          | 0.52         |
| 2-Cyclopenten-1-one, 2-methyl-                    | 9.6  | 544991          | 0.64         |
| 2-Cyclopenten-1-one, 3,4-dimethyl-                | 29.4 | 136475          | 0.16         |
| 2-Ethyl-3-methylcyclopent-2-en-1-one              | 18.0 | 71029           | 0.08         |
| Cyclohexanone, 2-isopropyl-2,5-dimethyl-          | 16.1 | 79909           | 0.09         |

|                                                       |      |                 |             |
|-------------------------------------------------------|------|-----------------|-------------|
| Cyclopentanone                                        | 4.2  | 33382           | 0.04        |
| Ethanone, 1-(2,3,4-trihydroxyphenyl)-                 | 24.2 | 57754           | 0.07        |
| p-Hydroxyphenylacetone                                | 24.0 | 128180          | 0.15        |
| <b>Methoxyaromatics HC</b>                            |      | <b>3548055</b>  | <b>4.14</b> |
| 1,5-Dimethoxy-4-methylnaphthalene                     | 29.7 | 51569           | 0.06        |
| Benzene, 1,2,3-trimethoxy-5-(1-propenyl)-, (E)-       | 29.0 | 171577          | 0.2         |
| Benzene, 1,2,3-trimethoxy-5-methyl-                   | 25.2 | 1773608         | 2.07        |
| Benzene, 1,2-dimethoxy-                               | 18.4 | 17150           | 0.02        |
| Benzene, 1,3-dimethoxy-2-(2-propenyloxy)-             | 27.9 | 850040          | 0.99        |
| Benzene, 1,3-dimethoxy-5-methyl-                      | 20.9 | 88082           | 0.1         |
| Benzene, 1,4-dimethoxy-2-methyl-                      | 20.7 | 152616          | 0.18        |
| Benzene, 4-butyl-1,2-dimethoxy-                       | 25.6 | 66052           | 0.08        |
| Benzene, methoxy-                                     | 10.3 | 46139           | 0.05        |
| Benzenepropanol, 4-hydroxy-3-methoxy-                 | 27.1 | 331222          | 0.39        |
| <b>Methoxycatechols</b>                               |      | <b>7338192</b>  | <b>8.56</b> |
| 1,2-Benzenediol, 3-methoxy-5-(2-propen-1-yl)-         | 53.6 | 307819          | 0.36        |
| 1,2-Benzenediol, 3-methoxy-                           | 20.8 | 143951          | 0.17        |
| 1,4-Benzenediol, 2-methoxy-                           | 20.7 | 6886422         | 8.03        |
| <b>Methoxyphenols</b>                                 |      | <b>16898117</b> | <b>19.7</b> |
| Phenol, 4-butyl-2-methoxy-                            | 25.3 | 923710          | 1.08        |
| (4-Methoxyphenyl)(5-methyl-2-furyl)methane            | 30.9 | 59699           | 0.07        |
| Phenol, 2,6-dimethoxy-4-methyl-                       | 24.0 | 3283984         | 3.83        |
| Phenol, 2-methoxy-                                    | 16.9 | 6154852         | 7.17        |
| Phenol, 2-methoxy-3-methyl-                           | 19.1 | 136254          | 0.16        |
| Phenol, 2-methoxy-4-propenyl-                         | 24.1 | 274826          | 0.32        |
| Phenol, 2-methoxy-4-propyl-                           | 22.7 | 1785865         | 2.08        |
| Phenol, 2-methoxy-5-(2-propenyl)-                     | 26.2 | 205889          | 0.24        |
| Phenol, 4-ethyl-2-methoxy-                            | 21.0 | 1860442         | 2.17        |
| Phenol, 4-methoxy-3-methyl-                           | 23.6 | 301356          | 0.35        |
| Phenol, 2-methoxy-4-methyl-                           | 19.4 | 1850915         | 2.16        |
| Phenol, 3-methoxy-                                    | 20.1 | 60325           | 0.07        |
| <b>Phenolic Aldehydes</b>                             |      | <b>2405789</b>  | <b>2.81</b> |
| 3,4-Dihydroxy-5-methoxybenzaldehyde                   | 26.2 | 67849           | 0.08        |
| Benzaldehyde, 3-hydroxy-                              | 22.6 | 62335           | 0.07        |
| Benzaldehyde, 3-hydroxy-4-methoxy-                    | 23.2 | 254863          | 0.3         |
| Benzaldehyde, 4-hydroxy-3,5-dimethoxy-                | 27.2 | 193350          | 0.23        |
| Homosyringaldehyde                                    | 26.5 | 1827392         | 2.13        |
| <b>Phenolic Ketones</b>                               |      | <b>3335028</b>  | <b>3.9</b>  |
| 1-(3-Methoxymethyl-2,4,5,6-tetramethylphenyl)ethanone | 30.5 | 135034          | 0.16        |
| 1,2-Benzenediol, 4-(2-propen-1-yl)-                   | 25.8 | 148716          | 0.17        |
| 1H-Inden-1-one, 2,3-dihydro-                          | 21.2 | 111014          | 0.13        |

|                                                                      |      |                |              |
|----------------------------------------------------------------------|------|----------------|--------------|
| 5-Sec-butylpyrogallol                                                | 25.4 | 810996         | 0.95         |
| 2-Butanone, 4-(4-hydroxy-3,5-dimethoxyphenyl)-                       | 28.7 | 817407         | 0.95         |
| 2H-1-Benzopyran-2-one, 3,4-dihydro-6-methyl-                         | 27.0 | 53659          | 0.06         |
| 4-Hydroxy-1-indanone                                                 | 26.7 | 78536          | 0.09         |
| Ethanone, 1-(2,5-dihydroxyphenyl)-                                   | 24.9 | 126032         | 0.15         |
| Ethanone, 1-(2,6-dihydroxyphenyl)-                                   | 27.2 | 150364         | 0.18         |
| Ethanone, 1-(2-hydroxy-6-methoxyphenyl)-                             | 22.0 | 35491          | 0.04         |
| Ethanone, 1-(3-hydroxy-4-methoxyphenyl)-                             | 24.6 | 271930         | 0.32         |
| Ethanone, 1-(3-hydroxyphenyl)-                                       | 23.2 | 256152         | 0.3          |
| Ethanone, 1-(4-hydroxy-3,5-dimethoxyphenyl)-                         | 28.2 | 339697         | 0.4          |
| Ethanone, 1-(2,3-dihydro-5-benzofuryl)-,<br>o-(4-chlorobenzoyl)oxime | 25.8 | 80110          | 0.09         |
| <b>Phenol</b>                                                        |      | <b>9748189</b> | <b>11.36</b> |
| Phenol                                                               | 13.8 | 9748189        | 11.36        |

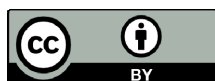

Supplement: s1 [file s1]
