# Supplementary material
Source: MDPI journal article supplement (https://www.mdpi.com/1996-1073/13/5/1241)
Supplement: s1 [file s1]

Archive with 2 entries (2 files):
- SI_Manuscript_HTL_Energies.pdf
- SI_Tables_S4-S5.xlsx
