# Supplementary material
Source: MDPI journal article supplement (https://www.mdpi.com/1996-1073/13/5/1241)
Supplement: s1 [file s1 › SI_Tables_S4-S5.xlsx]

## Sheet: Table S4 - GC-MS
	GC-MS - light biocrude BC1
	GC detectables weight percent [wt.%]			300-5-10		300-10-10		350-5-10			350-10-10		370-5-10	370-15-10		370-20-10	350-10-10 (Proc 2)		300-5-10-KOH2		350-5-10-KOH2		370-5-10-KOH2		350-5-10-KOH4		300-5-10CO2
	Compund class	Name 1	Name 2	A	B	A	B	A	B	C	A	B	A	A	B	A	A	B	A	B	A	B	A	B	A	B	A	B
	Catechols	1,2-Benzenediol	Catechol	0.00920962	0.00837961	0.0053837	0.00566863	0.00816222	0.0105211	0.00842374	0.00756083	0.0128504	0.0112216	0.016502	0.0130927	0.0221367	-	-	0.00532336	0.00589092	0.00778446	0.00682304	0.0117209	0.0138952	0.00919648	0.00723222	0.00527318	-
	Methoxycatechols	1,2-Benzenediol, 3-methoxy-	3-Methoxycatechol	-	-	0.00705456	0.00915643	0.015406	0.0199067	0.0188317	0.013594	0.0256659	0.0243943	0.0267312	0.0221039	0.0213276	0.00703977	0.0085254	0.00488131	0.00683821	0.0187781	0.0195281	0.0238947	0.0300049	0.0229973	0.0187768	-	-
	Phenolic Carbonyls	Benzaldehyde, 4-hydroxy-3-methoxy-	Vanillin	0.0082645	0.00753779	-	0.00516764	-	-	-	-	-	-	-	-	-	-	-	0.00591971	0.00622543	-	-	-	-	-	-	0.00837075	0.00823868
	Phenols	Phenol	Phenol	0.0425735	0.0471429	0.0582229	0.0653211	0.0233048	0.0420696	0.0357226	0.0211231	0.0300987	0.0290049	0.0312057	0.0289303	0.0314511	0.0113292	0.0108521	0.0494092	0.0600418	0.0285117	0.0306714	0.0308938	0.0317878	0.0283934	0.0294151	0.0678605	0.0663768
	Methoxyphenols	Phenol, 2-methoxy-	Guaiacol	0.00729606	0.00831084	0.0141665	0.0192495	0.0122544	0.0184185	0.0177193	0.0128953	0.0160595	0.0155127	0.0121105	0.0116382	0.00952481	0.00819172	0.0084153	0.0105213	0.0146867	0.0157168	0.0170896	0.016265	0.017101	0.0171463	0.0182971	0.00911645	0.00855595
	Dimethoxyphenols	Phenol, 2,6-dimethoxy-	Syringol	0.0249873	0.0225463	0.0358472	0.0474292	0.0279235	0.0394565	0.0358217	0.0247735	0.0300239	0.0266003	0.0127924	0.0120732	0.00815978	0.0175055	0.0178153	0.0326026	0.0409607	0.0309145	0.0334554	0.0202477	0.0240285	0.0322433	0.031939	0.0345451	0.0290522
	Cyclopentenones	2-Cyclopenten-1-one, 2,3-dimethyl-	2,3-Dimethyl-2-Cyclopenten-1-one	-	-	-	-	-	-	-	-	-	-	-	-	-	-	-	-	-	-	-	-	-	-	-	-	-
	Alkylphenols	Phenol, 3-methyl-	m-Cresol	-	-	-	-	-	-	-	-	-	-	-	-	-	-	-	-	-	-	-	-	-	-	-	-	-
	Methoxyphenols	Phenol, 2-methoxy-4-methyl-	Creosol	-	-	-	-	0.00504457	0.00600909	0.00614393	-	0.00568038	0.00638629	0.0062267	0.00602753	0.00532279	-	-	-	-	0.0049095	0.00524395	0.00606336	0.00665523	0.00479997	-	-	-
	Methoxyphenols	Phenol, 2-methoxy-4-propyl-	4-Propylguaiacol	-	-	-	-	-	-	-	-	-	-	-	-	-	-	-	-	-	-	-	-	-	-	-	-	-
	Phenolic Carbonyls	Benzaldehyde, 4-hydroxy-3,5-dimethoxy-	Syringaldehyde	0.0189848	0.0175846	0.00897972	0.00785821	-	0.00600642	-	-	-	-	-	-	-	-	-	0.0111305	0.0115872	-	-	-	-	-	-	0.0161904	0.0162326
	Acids	Acetic acid	Acetic acid	0.0134852	0.0253336	0.0272572	0.0299581	0.0160791	0.00771744	0.0172184	0.0106142	0.0110251	0.0132354	0.0149882	0.0112638	0.00924001	-	-	0.0124223	0.0164004	0.00991176	0.00966699	0.00638767	0.00834262	-	-	0.00740389	0.013414
	Cyclopentenones	Cyclopentenone	2-Cyclopenten-1-one	-	-	-	-	-	-	-	-	-	-	-	-	-	-	-	-	-	-	-	-	-	-	-	-	-
	Alkylphenols	Phenol, 4-methyl-	p-Cresol	-	-	-	-	-	-	-	-	-	-	-	-	-	-	-	-	-	-	-	-	-	-	-	-	-
	Methoxyphenols	Phenol, 2-methoxy-4-propenyl-	Isoeugenol cis+trans	-	0.00557637	-	-	-	-	-	-	-	-	-	-	-	-	-	0.00649895	0.00624145	-	-	-	-	-	-	0.0065556	0.00708201
	Dimethoxyphenols	Phenol, 2,6-dimethoxy-4-(2-propenyl)-	Methoxyeugenol	-	-	-	-	-	-	-	-	-	-	-	-	-	-	-	-	-	-	-	-	-	-	-	-	-
	Other Carbonyls	2,5-Hexadione	Acetonyl acetone	-	-	-	-	-	-	-	-	-	-	-	-	-	-	-	-	-	-	-	-	-	-	-	-	-
	Cyclopentenones	2-Cyclopenten-1-one, 3-methyl-	3-Methyl-2-Cyclopentenone	-	-	-	-	-	-	-	-	-	-	-	-	-	-	-	-	-	-	-	-	-	-	-	-	-
	Acids	Benzoic acid	Benzoic acid	0.00862146	0.00832566	-	-	-	0.00638711	-	-	0.00514324	-	-	-	-	-	-	0.0074791	0.00812993	-	-	-	-	-	-	0.0099701	0.00975327
	Catechols	1,4-Benzenediol	Hydroquinone	-	-	-	-	-	-	-	-	-	-	-	-	-	-	-	-	-	-	-	-	-	-	-	-	-
	Acids	Propionic acid	Propionic acid	-	-	-	-	-	-	-	-	-	-	-	-	-	-	-	-	-	-	-	-	-	-	-	-	-
	Cyclopentenones	1,2-Cyclopentanedione, 3-methyl-	3-Methyl-1,2-Cyclopentanedione	0.0103103	0.0103296	-	-	-	-	-	-	-	-	-	-	-	-	-	-	-	-	-	-	-	-	-	0.0134539	0.0120288
	Furanics	5-Hydroxymethylfurfural	HMF	-	0.0105707	-	-	-	-	-	-	-	-	-	-	-	-	-	-	-	-	-	-	-	-	-	-	0.0130852
	Other Carbonyls	2-Butanone, 3-hydroxy-	Acetoin	-	-	-	-	-	-	-	-	-	-	-	-	-	-	-	-	-	-	-	-	-	-	-	-	-
	Other Carbonyls	Cyclopentanone	Cyclopentanone	-	-	-	-	-	-	-	-	-	-	-	-	-	-	-	-	-	-	-	-	-	-	-	-	-
	Furanics	Ethanone, 1-(2-furanyl)-	2-Acetylfuran	-	-	-	-	-	-	-	-	-	-	-	-	-	-	-	-	-	-	-	-	-	-	-	-	-
	Phenolic Carbonyls	Ethanone, 1-(3-hydroxy-4-methoxyphenyl)-	Acetovanillone	-	-	-	-	-	-	-	-	-	-	-	-	-	-	-	-	-	-	-	-	-	-	-	-	-
	Phenolic Carbonyls	Ethanone, 1-(4-hydroxy-3,5-dimethoxyphenyl)-	Acetosyringone	0.00634744	0.00576634	-	-	-	-	-	-	-	-	-	-	-	-	-	-	0.00513919	-	-	-	-	-	-	-	-
	Aromatics/HC	Benzene, methyl	Toluene	-	-	-	-	-	-	-	-	-	-	-	-	-	-	-	-	-	-	-	-	-	-	-	-	-
	Alkylphenols	Phenol, 2-methyl-	o-Cresol	-	-	-	-	-	-	-	-	-	-	-	-	-	-	-	-	-	-	-	-	-	-	-	-	-
	Methoxyphenols	Phenol, 4-ethyl-2-methoxy-	4-Ethylguaiacol	-	-	-	-	-	0.00509376	0.00466928	-	0.00431967	-	-	-	-	-	-	-	-	0.00437481	-	-	0.00525245	0.00452665	0.00496588	-	-
	GC detectables std. deviations [wt.%]			300-5-10		300-10-10		350-5-10		350-5-10	350-10-10		370-5-10	370-15-10		370-20-10	350-10-10 (Proc 2)		300-5-10-KOH2		350-5-10-KOH2		370-5-10-KOH2		350-5-10-KOH4		300-5-10CO2
	Compund class	Name 1	Name 2	A	B	A	B	A	B	C	A	B	A	A	B	A	A	B	A	B	A	B	A	B	A	B	A	B
	Catechols	1,2-Benzenediol	Catechol	0.000367314	0.000367314	0.000367314	0.000367314	0.000367314	0.000367314	0.000367314	0.000367314	0.000367314	0.000367314	0.000367314	0.000367314	0.000367314	-	-	0.000367314	0.000367314	0.000367314	0.000367314	0.000367314	0.000367314	0.000367314	0.000367314	0.000367314	-
	Methoxycatechols	1,2-Benzenediol, 3-methoxy-	3-Methoxycatechol	-	-	0.000144325	0.000144325	0.000144325	0.000144325	0.000144325	0.000144325	0.000144325	0.000144325	0.000144325	0.000144325	0.000144325	0.000144325	0.000144325	0.000144325	0.000144325	0.000144325	0.000144325	0.000144325	0.000144325	0.000144325	0.000144325	-	-
	Phenolic Carbonyls	Benzaldehyde, 4-hydroxy-3-methoxy-	Vanillin	0.000108498	0.000108498	-	0.000108498	-	-	-	-	-	-	-	-	-	-	-	0.000108498	0.000108498	-	-	-	-	-	-	0.000108498	0.000108498
	Phenols	Phenol	Phenol	0.000570319	0.000570319	0.000570319	0.000570319	0.000570319	0.000570319	0.000570319	0.000570319	0.000570319	0.000570319	0.000570319	0.000570319	0.000570319	0.000570319	0.000570319	0.000570319	0.000570319	0.000570319	0.000570319	0.000570319	0.000570319	0.000570319	0.000570319	0.000570319	0.000570319
	Methoxyphenols	Phenol, 2-methoxy-	Guaiacol	0.000570319	0.000570319	0.000570319	0.000570319	0.000570319	0.000570319	0.000570319	0.000570319	0.000570319	0.000570319	0.000570319	0.000570319	0.000570319	0.000570319	0.000570319	0.000570319	0.000570319	0.000570319	0.000570319	0.000570319	0.000570319	0.000570319	0.000570319	0.000570319	0.000570319
	Dimethoxyphenols	Phenol, 2,6-dimethoxy-	Syringol	0.00011872	0.00011872	0.00011872	0.00011872	0.00011872	0.00011872	0.00011872	0.00011872	0.00011872	0.00011872	0.00011872	0.00011872	0.00011872	0.00011872	0.00011872	0.00011872	0.00011872	0.00011872	0.00011872	0.00011872	0.00011872	0.00011872	0.00011872	0.00011872	0.00011872
	Cyclopentenones	2-Cyclopenten-1-one, 2,3-dimethyl-	2,3-Dimethyl-2-Cyclopenten-1-one	-	-	-	-	-	-	-	-	-	-	-	-	-	-	-	-	-	-	-	-	-	-	-	-	-
	Alkylphenols	Phenol, 3-methyl-	m-Cresol	-	-	-	-	-	-	-	-	-	-	-	-	-	-	-	-	-	-	-	-	-	-	-	-	-
	Methoxyphenols	Phenol, 2-methoxy-4-methyl-	Creosol	-	-	-	-	2.88014e-05	2.88014e-05	2.88014e-05	-	2.88014e-05	2.88014e-05	2.88014e-05	2.88014e-05	2.88014e-05	-	-	-	-	2.88014e-05	2.88014e-05	2.88014e-05	2.88014e-05	2.88014e-05	-	-	-
	Methoxyphenols	Phenol, 2-methoxy-4-propyl-	4-Propylguaiacol	-	-	-	-	-	-	-	-	-	-	-	-	-	-	-	-	-	-	-	-	-	-	-	-	-
	Phenolic Carbonyls	Benzaldehyde, 4-hydroxy-3,5-dimethoxy-	Syringaldehyde	0.000243719	0.000243719	0.000243719	0.000243719	-	0.000243719	-	-	-	-	-	-	-	-	-	0.000243719	0.000243719	-	-	-	-	-	-	0.000243719	0.000243719
	Acids	Acetic acid	Acetic acid	0.00064813	0.00064813	0.00064813	0.00064813	0.00064813	0.00064813	0.00064813	0.00064813	0.00064813	0.00064813	0.00064813	0.00064813	0.00064813	-	-	0.00064813	0.00064813	0.00064813	0.00064813	0.00064813	0.00064813	-	-	0.00064813	0.00064813
	Cyclopentenones	Cyclopentenone	2-Cyclopenten-1-one	-	-	-	-	-	-	-	-	-	-	-	-	-	-	-	-	-	-	-	-	-	-	-	-	-
	Alkylphenols	Phenol, 4-methyl-	p-Cresol	-	-	-	-	-	-	-	-	-	-	-	-	-	-	-	-	-	-	-	-	-	-	-	-	-
	Methoxyphenols	Phenol, 2-methoxy-4-propenyl-	Isoeugenol cis+trans	-	9.49131e-05	-	-	-	-	-	-	-	-	-	-	-	-	-	9.49131e-05	9.49131e-05	-	-	-	-	-	-	9.49131e-05	9.49131e-05
	Dimethoxyphenols	Phenol, 2,6-dimethoxy-4-(2-propenyl)-	Methoxyeugenol	-	-	-	-	-	-	-	-	-	-	-	-	-	-	-	-	-	-	-	-	-	-	-	-	-
	Other Carbonyls	2,5-Hexadione	Acetonyl acetone	-	-	-	-	-	-	-	-	-	-	-	-	-	-	-	-	-	-	-	-	-	-	-	-	-
	Cyclopentenones	2-Cyclopenten-1-one, 3-methyl-	3-Methyl-2-Cyclopentenone	-	-	-	-	-	-	-	-	-	-	-	-	-	-	-	-	-	-	-	-	-	-	-	-	-
	Acids	Benzoic acid	Benzoic acid	0.000472716	0.000472716	-	-	-	0.000472716	-	-	0.000472716	-	-	-	-	-	-	0.000472716	0.000472716	-	-	-	-	-	-	0.000472716	0.000472716
	Catechols	1,4-Benzenediol	Hydroquinone	-	-	-	-	-	-	-	-	-	-	-	-	-	-	-	-	-	-	-	-	-	-	-	-	-
	Acids	Propionic acid	Propionic acid	-	-	-	-	-	-	-	-	-	-	-	-	-	-	-	-	-	-	-	-	-	-	-	-	-
	Cyclopentenones	1,2-Cyclopentanedione, 3-methyl-	3-Methyl-1,2-Cyclopentanedione	0.000541556	0.000541556	-	-	-	-	-	-	-	-	-	-	-	-	-	-	-	-	-	-	-	-	-	0.000541556	0.000541556
	Furanics	5-Hydroxymethylfurfural	HMF	-	0.000551377	-	-	-	-	-	-	-	-	-	-	-	-	-	-	-	-	-	-	-	-	-	-	0.000551377
	Other Carbonyls	2-Butanone, 3-hydroxy-	Acetoin	-	-	-	-	-	-	-	-	-	-	-	-	-	-	-	-	-	-	-	-	-	-	-	-	-
	Other Carbonyls	Cyclopentanone	Cyclopentanone	-	-	-	-	-	-	-	-	-	-	-	-	-	-	-	-	-	-	-	-	-	-	-	-	-
	Furanics	Ethanone, 1-(2-furanyl)-	2-Acetylfuran	-	-	-	-	-	-	-	-	-	-	-	-	-	-	-	-	-	-	-	-	-	-	-	-	-
	Phenolic Carbonyls	Ethanone, 1-(3-hydroxy-4-methoxyphenyl)-	Acetovanillone	-	-	-	-	-	-	-	-	-	-	-	-	-	-	-	-	-	-	-	-	-	-	-	-	-
	Phenolic Carbonyls	Ethanone, 1-(4-hydroxy-3,5-dimethoxyphenyl)-	Acetosyringone	5.63008e-05	5.63008e-05	-	-	-	-	-	-	-	-	-	-	-	-	-	-	5.63008e-05	-	-	-	-	-	-	-	-
	Aromatics/HC	Benzene, methyl	Toluene	-	-	-	-	-	-	-	-	-	-	-	-	-	-	-	-	-	-	-	-	-	-	-	-	-
	Alkylphenols	Phenol, 2-methyl-	o-Cresol	-	-	-	-	-	-	-	-	-	-	-	-	-	-	-	-	-	-	-	-	-	-	-	-	-
	Methoxyphenols	Phenol, 4-ethyl-2-methoxy-	4-Ethylguaiacol	-	-	-	-	-	5.36269e-05	5.36269e-05	-	5.36269e-05	-	-	-	-	-	-	-	-	5.36269e-05	-	-	5.36269e-05	5.36269e-05	5.36269e-05	-	-

## Sheet: Table S5 - HPLC
	HPLC - aqueous phase (AP)
	HPLC detectables concentration [mg/ml]			Feedstock	300-5-10		300-10-10		350-5-10			350-10-10			370-5-10		370-15-10		370-20-10		350-10-10 (Proc 2)		300-5-10 KOH2		350-5-10 KOH2		350-5-10 KOH4	350-5-10 KOH4	370-5-10 KOH2	370-5-10 KOH2	300-5-10 CO2	300-5-10 CO2
	Compund class	Name 1	Name 2	0.1	A	B	A	B	A	B	C	A	B	C	A	B	A	B	A	B	A	B	A	B	A	B	A	B	A	B	A	B
	Phenol	Phenol	Phenol	-	0.186	0.225667	0.0666667	0.0503333	0.0816667	0.144667	-	0.127	0.0123333	0.960333	-	-	0.0163333	0.0293333	0.0336667	0.0176667	0.814333	0.838	0.017	0.011	-	-	0.031	-	0.0176667	0.0186667	0.0713333	0.0796667
	Methoxyphenols	Phenol, 2-methoxy-	Guaiacol	-	0.0403333	0.039	0.0193333	0.013	0.0516667	0.085	-	0.085	0.0103333	0.486667	-	-	0.0126667	0.0186667	0.0146667	0.011	0.407	0.428	0.007	0.005	-	-	0.03	-	0.0166667	0.013	0.0153333	0.0136667
	Dimethoxyphenols	Phenol, 2,6-dimethoxy-	Syringol	-	0.106667	0.12	0.0693333	0.0506667	0.126667	0.187	-	0.156667	0.0246667	0.694	-	-	0.009	0.0133333	0.00266667	0.00366667	0.573333	0.538333	0.0303333	0.018	-	-	0.0973333	-	0.023	0.0236667	0.045	0.049
	Sugars	Cellobiose	Cellobiose	-	-	-	-	-	-	-	-	-	-	-	-	-	-	-	-	-	-	-	-	-	-	-	-	-	-	-	-	-
	Sugars	Glucose	Glucose	0.547667	-	-	-	-	-	-	-	-	-	-	-	-	-	-	-	-	-	-	-	-	-	-	-	-	-	-	-	-
	Sugars	XMG	XMG	0.809333	-	-	-	-	-	-	-	-	-	-	-	-	-	-	-	-	-	-	-	-	-	-	-	-	-	-	-	-
	Sugars	Arabinose	Arabinose	-	-	-	-	-	-	-	-	-	-	-	-	-	-	-	-	-	-	-	-	-	-	-	-	-	-	-	-	-
	Sugars	Xylitol	Xylitol	-	-	-	-	-	-	-	-	-	-	-	-	-	-	-	-	-	-	-	-	-	-	-	-	-	-	-	-	-
	Acids	Acetic acid	Acetic acid	0.365667	1.06767	1.29667	0.958	1.019	0.858333	1.025	0.911333	1.08267	0.923333	1.847	0.915	0.919333	1.38033	1.39067	1.54733	1.49733	1.688	1.71133	0.882	0.776667	1.15367	1.19133	1.622	1.58067	1.58333	1.66367	1.00367	0.952333
	Acids	Propionic acid	Propionic acid	-	-	-	-	-	-	-	-	-	-	-	-	-	-	-	-	-	-	-	-	-	-	-	-	-	-	-	-	-
	Acids	Succinic acid	Succinic acid	0.141667	0.103	0.104667	0.106	0.121	0.141	0.137333	0.0476667	0.132667	0.115667	0.147	0.0486667	0.036	0.124333	0.124333	0.120333	0.120333	0.132333	0.123667	0.129333	0.119	0.042	0.0536667	-	0.0456667	0.149333	0.157667	0.14	0.136
	Acids	Lactic acid	Lactic acid	2.42867	2.849	2.90467	2.027	2.262	2.074	2.046	1.92567	1.68633	1.50567	1.66733	1.2	1.12167	0.531333	0.529333	0.411667	0.390667	1.56033	1.58567	2.60333	2.4	2.42567	2.677	3.08433	2.96833	1.53967	1.67333	2.67567	2.72133
	Alcohols	Glycerol	Glycerol	0.355	0.522	0.524	0.236333	0.273	0.547	0.531667	0.559333	0.519	0.474	0.523333	0.514333	0.509	0.434	0.447333	0.414667	0.419333	0.492667	0.474667	0.496667	0.467333	0.624667	0.662667	0.633	0.698667	0.483	0.575667	0.546	0.562
	Acids	Glutaric acid	Glutaric acid	-	0.218667	0.228333	0.17	0.159333	0.0873333	0.0986667	0.0363333	0.0856667	0.0653333	0.104667	-	-	0.057	0.053	0.0563333	0.0466667	0.0986667	0.0863333	0.231667	0.217	-	-	-	-	0.112667	0.125333	0.205	0.240333
	Acids	Glycolic acid	Glycolic acid	0.0716667	1.54667	1.59567	1.05733	1.18167	1.90033	1.92233	1.891	1.80767	1.61267	1.83367	1.718	1.56033	1.26233	1.26033	1.02133	1.07767	1.67433	1.67767	1.512	1.48367	2.32033	2.60567	0.178	2.841	1.982	2.13967	1.599	1.60233
	Acids	Formic acid	Formic acid	-	-	-	-	-	-	-	-	-	-	-	-	-	-	-	-	-	-	-	-	-	-	-	-	-	-	-	-	-
	Alcohols	Ethanol	Ethanol	-	0.242333	0.232667	0.365667	0.345667	0.564667	0.366	0.437667	0.513333	0.405333	-	0.424333	0.426333	0.534	0.536	0.478667	0.472667	0.125333	0.0413333	0.536333	0.358667	0.433	0.586	0.711	0.934667	0.559	0.524	0.341333	0.387
	Furanics	5-Hydroxymethylfurfural	HMF	-	0.117667	0.118	-	-	-	-	-	-	-	-	-	-	-	-	-	-	-	-	-	-	-	-	-	-	-	-	-	-
	Furanics	2-Furancarboxaldehyde	Furfural	-	0.0553333	0.0626667	-	-	-	-	-	-	-	-	-	-	-	-	-	-	-	-	-	-	-	-	-	-	-	-	0.0683333	0.0726667
	Catechols	1,2-Benzenediol	Catechol	-	0.0536667	0.0513333	-	-	0.0693333	0.094	-	0.101	-	0.444667	-	0.004	0.0806667	0.0883333	0.122667	0.0713333	0.378	0.413667	-	-	-	-	0.0683333	-	0.0773333	0.0606667	0.024	0.0323333
	Methoxycatechols	1,2-Benzenediol, 3-methoxy-	3-Methoxycatechol	-	0.0243333	0.0253333	0.0343333	0.031	0.113	0.0883333	-	0.0856667	-	0.753333	-	-	0.0563333	0.0766667	0.0626667	0.0593333	0.547333	0.516	0.023	0.0226667	0.0286667	-	0.142333	0.051	0.0823333	0.067	0.0306667	0.0313333
	Acids	Benzoic acid	Benzoic acid	0.0346667	0.0716667	0.0756667	0.0613333	0.0593333	0.0863333	0.097	0.0583333	0.088	0.0666667	0.173667	0.0683333	0.0606667	0.0156667	0.019	0.0173333	0.0166667	0.154	0.141333	0.0273333	0.0213333	0.048	0.0526667	0.0496667	0.043	0.0253333	0.0243333	0.0433333	0.0393333
	Cyclopentenones	1,2-Cyclopentanedione, 3-methyl-	3-Methyl-1,2-Cyclopentanedione	-	-	-	-	-	-	-	-	-	-	0.0216667	-	-	-	-	-	-	0.0953333	-	-	-	-	-	-	-	-	-	-	-
	Alcohols	Methanol	Methanol	-	1.55967	1.682	2.49933	16.9973	3.44067	3.57	3.73167	3.72333	3.50367	5.757	3.60467	3.708	4.336	4.14467	5.367	4.775	5.13733	4.98067	2.65167	2.67433	4.877	5.191	6.64133	6.61067	5.12367	5.421	1.82233	1.668
	HPLC detectables std. deviations [mg/ml]			Feedstock	300-5-10		300-10-10		350-5-10			350-10-10			370-5-10		370-15-10		370-20-10		350-10-10 (Proc 2)		300-5-10 KOH2		350-5-10 KOH2		350-5-10 KOH4	350-5-10 KOH4	370-5-10 KOH2	370-5-10 KOH2	300-5-10 CO2	300-5-10 CO2
	Compund class	Name 1	Name 2	0.1	A	B	A	B	A	B	C	A	B	C	A	B	A	B	A	B	A	B	A	B	A	B	A	B	A	B	A	B
	Phenol	Phenol	Phenol	-	0.001	0.001	0.001	0.001	0.001	0.001	-	0.001	0.001	0.001	-	-	0.001	0.001	0.001	0.001	0.001	0.001	0.001	0.001	-	-	0.001	-	0.001	0.001	0.001	0.001
	Methoxyphenols	Phenol, 2-methoxy-	Guaiacol	-	0.001	0.001	0.001	0.001	0.001	0.001	-	0.001	0.001	0.001	-	-	0.001	0.001	0.001	0.001	0.001	0.001	0.001	0.001	-	-	0.001	-	0.001	0.001	0.001	0.001
	Dimethoxyphenols	Phenol, 2,6-dimethoxy-	Syringol	-	0.001	0.001	0.001	0.001	0.001	0.001	-	0.001	0.001	0.001	-	-	0.001	0.001	0.001	0.001	0.001	0.001	0.001	0.001	-	-	0.001	-	0.001	0.001	0.001	0.001
	Sugars	Cellobiose	Cellobiose	-	-	-	-	-	-	-	-	-	-	-	-	-	-	-	-	-	-	-	-	-	-	-	-	-	-	-	-	-
	Sugars	Glucose	Glucose	0	-	-	-	-	-	-	-	-	-	-	-	-	-	-	-	-	-	-	-	-	-	-	-	-	-	-	-	-
	Sugars	XMG	XMG	0	-	-	-	-	-	-	-	-	-	-	-	-	-	-	-	-	-	-	-	-	-	-	-	-	-	-	-	-
	Sugars	Arabinose	Arabinose	-	-	-	-	-	-	-	-	-	-	-	-	-	-	-	-	-	-	-	-	-	-	-	-	-	-	-	-	-
	Sugars	Xylitol	Xylitol	-	-	-	-	-	-	-	-	-	-	-	-	-	-	-	-	-	-	-	-	-	-	-	-	-	-	-	-	-
	Acids	Acetic acid	Acetic acid	0.0140475	0.0140475	0.0140475	0.0140475	0.0140475	0.0140475	0.0140475	0.0140475	0.0140475	0.0140475	0.0140475	0.0140475	0.0140475	0.0140475	0.0140475	0.0140475	0.0140475	0.0140475	0.0140475	0.0140475	0.0140475	0.0140475	0.0140475	0.0140475	0.0140475	0.0140475	0.0140475	0.0140475	0.0140475
	Acids	Propionic acid	Propionic acid	-	-	-	-	-	-	-	-	-	-	-	-	-	-	-	-	-	-	-	-	-	-	-	-	-	-	-	-	-
	Acids	Succinic acid	Succinic acid	0.00264575	0.00264575	0.00264575	0.00264575	0.00264575	0.00264575	0.00264575	0.00264575	0.00264575	0.00264575	0.00264575	0.00264575	0.00264575	0.00264575	0.00264575	0.00264575	0.00264575	0.00264575	0.00264575	0.00264575	0.00264575	0.00264575	0.00264575	-	0.00264575	0.00264575	0.00264575	0.00264575	0.00264575
	Acids	Lactic acid	Lactic acid	0.0113578	0.0113578	0.0113578	0.0113578	0.0113578	0.0113578	0.0113578	0.0113578	0.0113578	0.0113578	0.0113578	0.0113578	0.0113578	0.0113578	0.0113578	0.0113578	0.0113578	0.0113578	0.0113578	0.0113578	0.0113578	0.0113578	0.0113578	0.0113578	0.0113578	0.0113578	0.0113578	0.0113578	0.0113578
	Alcohols	Glycerol	Glycerol	0.00458258	0.00458258	0.00458258	0.00458258	0.00458258	0.00458258	0.00458258	0.00458258	0.00458258	0.00458258	0.00458258	0.00458258	0.00458258	0.00458258	0.00458258	0.00458258	0.00458258	0.00458258	0.00458258	0.00458258	0.00458258	0.00458258	0.00458258	0.00458258	0.00458258	0.00458258	0.00458258	0.00458258	0.00458258
	Acids	Glutaric acid	Glutaric acid	-	0.001	0.001	0.001	0.001	0.001	0.001	0.001	0.001	0.001	0.001	-	-	0.001	0.001	0.001	0.001	0.001	0.001	0.001	0.001	-	-	-	-	0.001	0.001	0.001	0.001
	Acids	Glycolic acid	Glycolic acid	0.0125033	0.0125033	0.0125033	0.0125033	0.0125033	0.0125033	0.0125033	0.0125033	0.0125033	0.0125033	0.0125033	0.0125033	0.0125033	0.0125033	0.0125033	0.0125033	0.0125033	0.0125033	0.0125033	0.0125033	0.0125033	0.0125033	0.0125033	0.0125033	0.0125033	0.0125033	0.0125033	0.0125033	0.0125033
	Acids	Formic acid	Formic acid	-	-	-	-	-	-	-	-	-	-	-	-	-	-	-	-	-	-	-	-	-	-	-	-	-	-	-	-	-
	Alcohols	Ethanol	Ethanol	-	0.001	0.001	0.001	0.001	0.001	0.001	0.001	0.001	0.001	-	0.001	0.001	0.001	0.001	0.001	0.001	0.001	0.001	0.001	0.001	0.001	0.001	0.001	0.001	0.001	0.001	0.001	0.001
	Furanics	5-Hydroxymethylfurfural	HMF	-	0.001	0.001	-	-	-	-	-	-	-	-	-	-	-	-	-	-	-	-	-	-	-	-	-	-	-	-	-	-
	Furanics	2-Furancarboxaldehyde	Furfural	-	0.001	0.001	-	-	-	-	-	-	-	-	-	-	-	-	-	-	-	-	-	-	-	-	-	-	-	-	0.001	0.001
	Catechols	1,2-Benzenediol	Catechol	-	0.001	0.001	-	-	0.001	0.001	-	0.001	-	0.001	-	0.001	0.001	0.001	0.001	0.001	0.001	0.001	-	-	-	-	0.001	-	0.001	0.001	0.001	0.001
	Methoxycatechols	1,2-Benzenediol, 3-methoxy-	3-Methoxycatechol	-	0.001	0.001	0.001	0.001	0.001	0.001	-	0.001	-	0.001	-	-	0.001	0.001	0.001	0.001	0.001	0.001	0.001	0.001	0.001	-	0.001	0.001	0.001	0.001	0.001	0.001
	Acids	Benzoic acid	Benzoic acid	0.0011547	0.0011547	0.0011547	0.0011547	0.0011547	0.0011547	0.0011547	0.0011547	0.0011547	0.0011547	0.0011547	0.0011547	0.0011547	0.0011547	0.0011547	0.0011547	0.0011547	0.0011547	0.0011547	0.0011547	0.0011547	0.0011547	0.0011547	0.0011547	0.0011547	0.0011547	0.0011547	0.0011547	0.0011547
	Cyclopentenones	1,2-Cyclopentanedione, 3-methyl-	3-Methyl-1,2-Cyclopentanedione	-	-	-	-	-	-	-	-	-	-	0.001	-	-	-	-	-	-	0.001	-	-	-	-	-	-	-	-	-	-	-
	Alcohols	Methanol	Methanol	-	0.001	0.001	0.001	0.001	0.001	0.001	0.001	0.001	0.001	0.001	0.001	0.001	0.001	0.001	0.001	0.001	0.001	0.001	0.001	0.001	0.001	0.001	0.001	0.001	0.001	0.001	0.001	0.001
